# Supplementary material
Source: publisher figshare collection journal article supplement (https://acs.figshare.com/ndownloader/files/5765310)

**Cyanoethyl-*N,N*-diisopropylaminomethoxy phosphine.**<sup>18</sup> To a mixture containing 0.17 mL (136 mg, 4.23 mmol) of anhydrous MeOH and 1.47 mL (1.09 g, 8.46 mmol) of ethyl diisopropylamine in 10 mL of dry CH<sub>2</sub>Cl<sub>2</sub> was added 1.0 g (4.23 mmol) of cyanoethyl-*N,N*-diisopropylchlorophosphoramidite at 0 °C. The reaction mixture was stirred at room temperature for 1h. The reaction mixture was quenched by the addition of 10 mL of saturated aqueous NaHCO<sub>3</sub> and the resulting solution was partitioned against EtOAc. The organic layer was washed with brine and dried over MgSO<sub>4</sub>. Concentration under diminished pressure gave the desired phosphine as a colorless liquid: yield 969 mg (99%); <sup>1</sup>H NMR (CDCl<sub>3</sub>) δ 1.19 (d, 12H, *J* = 7 Hz), 2.64 (t, 2H, *J* = 7 Hz), 3.42 (d, 3H, *J* = 13 Hz), 3.54 - 3.63 (m, 2H) and 3.75 - 3.90 (m, 2H). The product was used for the next reaction without further purification.

**2,5-Dimethoxy-2,5-dihydrofurfuryl cyanoethyl methyl phosphate.** Samples containing 1.01 g (6.36 mmol) 2,5-dimethoxy-2,5-dihydrofurfuryl alcohol (**7a**)<sup>17</sup> and 889 mg (12.7 mmol) of tetrazole were added to a round bottom flask equipped with a magnetic stir bar and co-evaporated twice with portions of toluene. The mixture was then suspended in 15 mL of dry CH<sub>3</sub>CN and cooled to 0 °C. A solution of 966 mg (4.16 mmol) of the foregoing phosphine in 5 mL of dry CH<sub>3</sub>CN was added dropwise over a period of 5 min. The reaction mixture was stirred at 0 °C for 30 min and then at room temperature for 1 h. The reaction mixture was concentrated under diminished pressure and the residue was dissolved in 14 mL of a solution containing 0.6 g of I<sub>2</sub> in a mixture of 13:1:0.2 THF-water-pyridine. The reaction mixture was stirred at room temperature for 20 min and then concentrated under diminished pressure. The residue was dissolved in 10 mL of CHCl<sub>3</sub> and washed with 10 mL of 1% aqueous sodium bisulfite. The aqueous layer was extracted with CHCl<sub>3</sub>, washed with brine and dried (MgSO<sub>4</sub>). After concentration of the organic phase, the residue was purified on a 20-g silica gel column; elution with 1:4 and then with 2:1 AcOEt-*n*-hexane gave the desired product as a colorless liquid: yield

548 mg (42%); silica gel TLC  $R_f$  0.08 (1:1 AcOEt-*n*-hexane);  $^1\text{H NMR}$  ( $\text{CDCl}_3$ )  $\delta$  2.77 (d, 2H,  $J = 6$  Hz), 3.24 (s, 3H), 3.52 (s, 3H), 3.81 (d, 3H,  $J = 11$  Hz), 4.00 - 4.32 (m, 4H), 5.53 (s, 1H), 5.98 (d, 1H,  $J = 6$  Hz) and 6.16 (d, 1H,  $J = 6$  Hz); mass spectrum (FAB),  $m/z$  306.0753 ( $\text{M-H}^+$ ) ( $\text{C}_{11}\text{H}_{17}\text{NO}_7\text{P}$  requires 306.0743).

**2,2-Dimethoxypropionyl cyanoethyl methyl phosphate.** In analogy with the synthesis of 2,5-dimethoxy-2,5-dihydrofurfuryl cyanoethyl methyl phosphate; 480 mg (4.0 mmol) of 2,2-dimethoxypropionyl alcohol (**7c**) was treated with 500 mg (2.0 mmol) of cyanoethyl-*N,N*-diisopropylamino methoxy phosphine in the presence of 560 mg (8.0 mmol) of tetrazole to give the desired product as a colorless liquid: yield 131 mg (25%); silica gel TLC  $R_f$  0.08 (1:1 AcOEt-*n*-hexane);  $^1\text{H NMR}$  ( $\text{CDCl}_3$ )  $\delta$  1.37 (s, 3H), 2.78 (t, 1H,  $J = 6$  Hz), 2.79 (t, 1H,  $J = 6$  Hz), 3.24 (s, 6H), 3.83 (d, 3H,  $J = 11$  Hz), 3.99 (d, 1H,  $J = 6$  Hz), 4.00 (d, 1H,  $J = 6$  Hz) and 4.27 (dt, 2H,  $J = 8, 6$  Hz); mass spectrum (FAB),  $m/z$  266.2799 ( $\text{M-H}^+$ ) ( $\text{C}_9\text{H}_{17}\text{NO}_6\text{P}$  requires 266.2794).

**2,5-Dimethoxy-2,5-dihydrofurfuryl methyl phosphate (13a).** A reaction mixture containing 485 mg (1.58 mmol) of 2,5-dimethoxy-2,5-dihydrofurfuryl cyanomethyl methyl phosphate in 5 mL of pyridine and 5 mL of  $\text{NH}_4\text{OH}$  was stirred at room temperature for 2 h. The solvent was concentrated under diminished pressure and the residue was co-evaporated twice with portions of EtOH. The residue was purified on a Dowex 50W X2 column (100 - 200 mesh,  $\text{Na}^+$  form); elution with  $\text{H}_2\text{O}$  gave **13a** as a pale yellow liquid: yield 401 mg (92%);  $^1\text{H NMR}$  ( $\text{D}_2\text{O}$ )  $\delta$  3.08, 3.14, 3.36 and 3.43 (each s, 6H), 3.43 - 3.49 (m, 3H), 3.68 - 3.89 (m, 2H), 5.58 and 5.88 (each br, 1H), 6.06 (m, 1H) and 6.17 (m, 1H); mass spectrum (FAB),  $m/z$  253.0456 ( $\text{M-H}^+$ ) ( $\text{C}_8\text{H}_{14}\text{O}_7\text{P}$  requires 253.0477).

**2,2-Dimethoxypropionyl methyl phosphate (13c).** A reaction mixture containing 100

mg (0.38 mmol) of 2,2-dimethoxypropionyl cyanoethyl methyl phosphate in 1 mL of pyridine and 1 mL of  $\text{NH}_4\text{OH}$  was stirred at room temperature for 2 h. The solvent was concentrated under diminished pressure and co-evaporated twice with portions of EtOH. The residue was purified on a Dowex 50W X2 column (100 - 200 mesh,  $\text{Na}^+$  form); elution with  $\text{H}_2\text{O}$  gave **13c** as a pale yellow liquid: yield 88 mg (92%);  $^1\text{H NMR}$  ( $\text{D}_2\text{O}$ )  $\delta$  1.27 (s, 3H), 3.14 (s, 6H), 3.46 (d, 3H,  $J = 11$  Hz), 3.66 (d, 2H,  $J = 5$  Hz); mass spectrum (FAB),  $m/z$  237.0530 ( $\text{M}+\text{Na}^+$ ) ( $\text{C}_6\text{H}_{14}\text{O}_6\text{PNa}$  requires 237.0504).

**Reference**

- (18) (a) Gait, M. J. In *Oligonucleotide Synthesis, A Practical Approach*, IRL Press, Oxford, Washington, DC, 1984. (b) Uhlmann, E.; Engels, J. *Tetrahedron Lett.*, **1986**, 27, 1023.

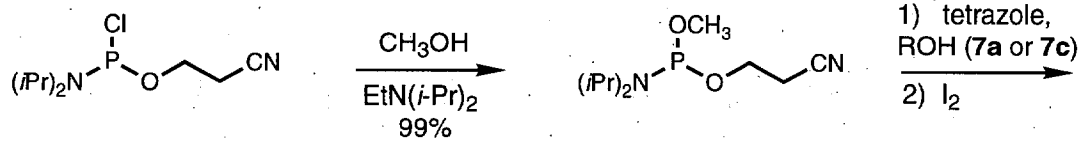

1) tetrazole,  
ROH (**7a** or **7c**)  
2) I<sub>2</sub>

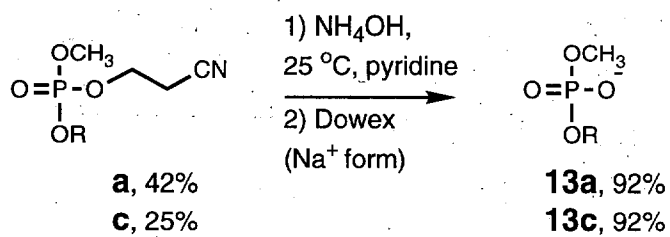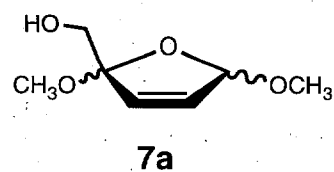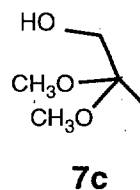

Supplement: Supplementary file 1 [file 5765310]
